# Supplementary material
Source: PubMed Central journal article supplement (PMC2923891)

Supplementary Figure 1

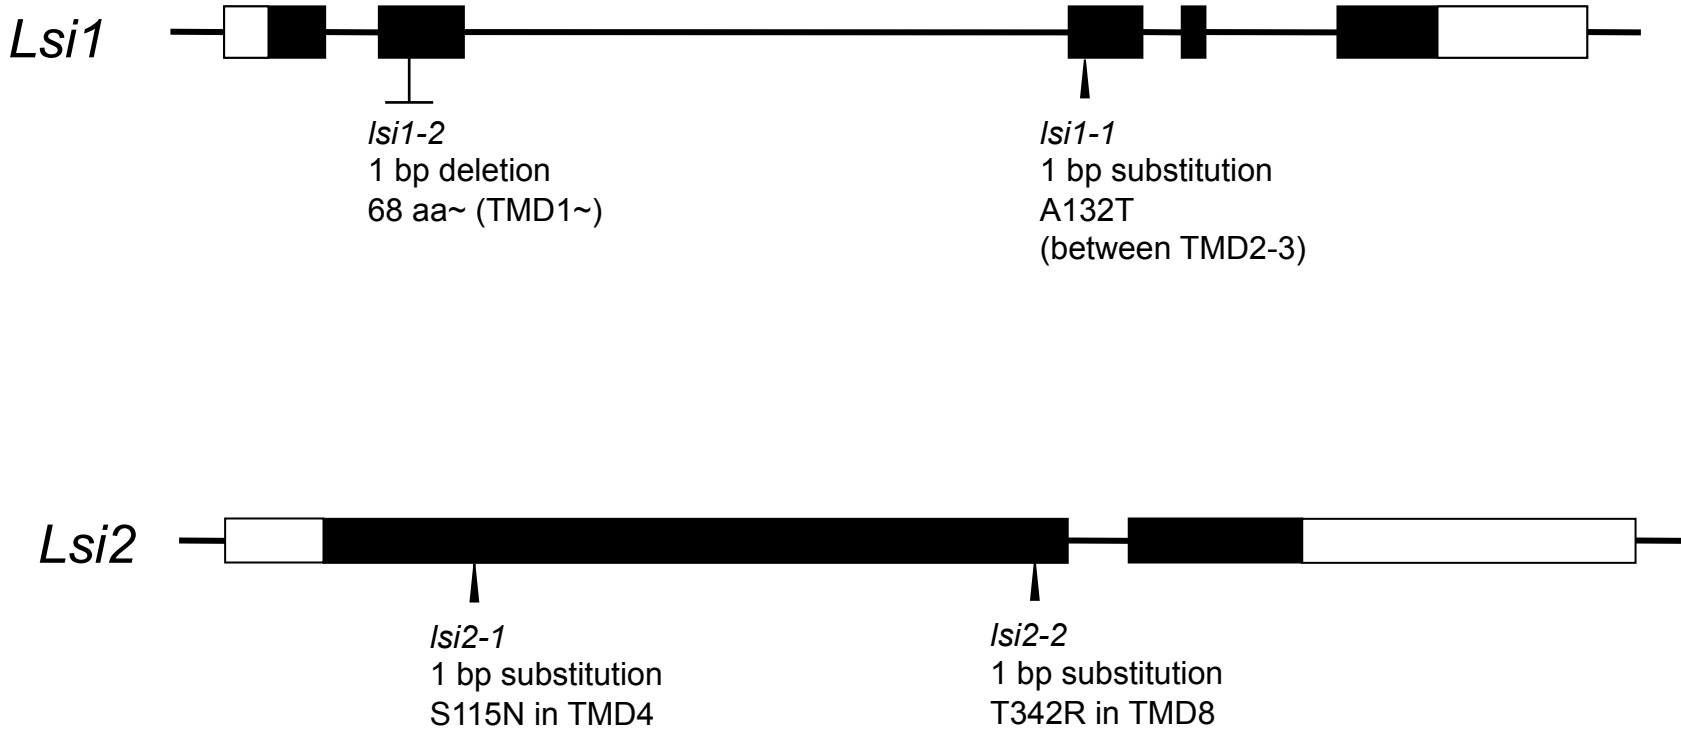

Supplement: pp.110.157867_1.pdf [file pp.110.157867_1.pdf]
